# Supplementary material for: Two-step detection of Lewy body pathology via smell-function testing and CSF α-synuclein seed amplification
Source: Springer Nature journal article supplement (doi:10.1038/s41467-025-62458-7), 2025-08-05
Supplement: MOESM1 [file 41467_2025_62458_MOESM1_ESM.pdf › 41467_2025_62458_MOESM1_ESM.pdf]

## SUPPLEMENTAL RESULTS

**Table S1.** Participant characteristics at baseline

|                                        | <b>Whole cohort<br/>(N=358)</b> |
|----------------------------------------|---------------------------------|
| <b>Age at death, years</b>             | 86.2 (7.8)                      |
| <b>Sex, n female</b>                   | 153 (42.7%)                     |
| <b>UPSIT score</b>                     | 20.8 (8.6)                      |
| <b>Interval UPSIT and death, years</b> | 3.2 (2.3)                       |
| <b>CSF SAA+, n</b>                     | 152 (42.5%)                     |
| <b>LBP<sub>any</sub>+, n</b>           | 170 (47.5%)                     |
| <b>LBP<sub>ctx</sub>+, n</b>           | 126 (35.2%)                     |
| <b>LBP<sub>B/L-N</sub>+, n</b>         | 107 (29.9%)                     |
| <b>PMI, hours</b>                      | 3.9 (3.9)                       |

B/L-N = brainstem/limbic or neocortical; CSF = cerebrospinal fluid; ctx = cortex; LBP = Lewy body pathology; PMI = postmortem interval; UPSIT = University of Pennsylvania Smell Identification Test.

**Table S2.** Clinicopathological diagnosis

|                              | <b>Overall<br/>(N=358)</b> |
|------------------------------|----------------------------|
| <b>AD</b>                    | 68 (19.0%)                 |
| <b>AD and DLB</b>            | 25 (7.0%)                  |
| <b>AD, DLB, and VaD</b>      | 1 (0.3%)                   |
| <b>AD and HS</b>             | 3 (0.8%)                   |
| <b>AD and PD</b>             | 15 (4.2%)                  |
| <b>AD, PD, and HS</b>        | 1 (0.3%)                   |
| <b>AD, PD, and PSP</b>       | 1 (0.3%)                   |
| <b>AD and PSP</b>            | 4 (1.1%)                   |
| <b>AD, PSP, and FTLD-TDP</b> | 1 (0.3%)                   |
| <b>AD and VaD</b>            | 11 (3.1%)                  |
| <b>AD, VaD, and FTLD-TDP</b> | 1 (0.3%)                   |
| <b>AD, VaD, and PSP</b>      | 1 (0.3%)                   |
| <b>Control</b>               | 58 (16.2%)                 |
| <b>ILBD</b>                  | 18 (5.0%)                  |
| <b>MCI NOS</b>               | 56 (15.6%)                 |
| <b>PSP</b>                   | 19 (5.3%)                  |
| <b>MND</b>                   | 1 (0.3%)                   |
| <b>Dementia NOS</b>          | 4 (1.1%)                   |
| <b>HS, MND, and FTLD-TDP</b> | 1 (0.3%)                   |
| <b>MSA</b>                   | 3 (0.8%)                   |
| <b>PD</b>                    | 47 (13.1%)                 |
| <b>PD and CBD</b>            | 2 (0.6%)                   |
| <b>PD and PSP</b>            | 5 (1.4%)                   |
| <b>DLB and HS</b>            | 1 (0.3%)                   |
| <b>DLB</b>                   | 1 (0.3%)                   |
| <b>AD and PSP</b>            | 1 (0.3%)                   |
| <b>AD, VaD, PSP, and HS</b>  | 1 (0.3%)                   |
| <b>VaD</b>                   | 4 (1.1%)                   |
| <b>VaD, HS, and FTLD-TDP</b> | 1 (0.3%)                   |
| <b>PICKS disease</b>         | 1 (0.3%)                   |
| <b>VaD and CBD</b>           | 1 (0.3%)                   |
| <b>MS</b>                    | 1 (0.3%)                   |

AD = Alzheimer's disease; CBD = corticobasal degeneration; DLB = dementia with Lewy

bodies; FTLD = frontotemporal lobar degeneration; HS = hippocampal sclerosis; ILBD = incidental Lewy body disease; MCI = mild cognitive impairment; MND = motor neuron disease; MS = multiple sclerosis; MSA = multiple system atrophy; NOS = not otherwise specified; PD = Parkinson's disease; PSP = progressive supranuclear palsy; VaD = vascular dementia.

**Table S3.** *Antemortem* clinical diagnosis

|                                                          | <b>Overall<br/>(N=358)</b> |
|----------------------------------------------------------|----------------------------|
| <b>AD</b>                                                | 3 (0.8%)                   |
| <b>AD and Lewy body disease</b>                          | 1 (0.3%)                   |
| <b>AD and/or CvD</b>                                     | 1 (0.3%)                   |
| <b>AD and DLB</b>                                        | 1 (0.3%)                   |
| <b>AD and VaD</b>                                        | 6 (1.7%)                   |
| <b>ALS</b>                                               | 1 (0.3%)                   |
| <b>Clinically impaired, NOS</b>                          | 86 (24.0%)                 |
| <b>Clinically impaired, NOS or FTD</b>                   | 1 (0.3%)                   |
| <b>DLB</b>                                               | 7 (2.0%)                   |
| <b>DLB, AD, or PD</b>                                    | 1 (0.3%)                   |
| <b>DLB or probable AD</b>                                | 1 (0.3%)                   |
| <b>Cognitively unimpaired</b>                            | 78 (21.8%)                 |
| <b>Cognitively unimpaired or clinically impaired NOS</b> | 4 (1.1%)                   |
| <b>Cognitively unimpaired, parkinsonism</b>              | 5 (1.4%)                   |
| <b>Mixed AD</b>                                          | 1 (0.3%)                   |
| <b>Mixed VaD</b>                                         | 2 (0.6%)                   |
| <b>MSA</b>                                               | 1 (0.3%)                   |
| <b>MSA and NPH</b>                                       | 1 (0.3%)                   |
| <b>PD</b>                                                | 64 (17.9%)                 |
| <b>PD and DLB</b>                                        | 1 (0.3%)                   |
| <b>PD or DLB</b>                                         | 1 (0.3%)                   |
| <b>PD, DLB, FTD, or PSP</b>                              | 1 (0.3%)                   |
| <b>PD, MSA, PSP, or CBD</b>                              | 1 (0.3%)                   |
| <b>PLS</b>                                               | 1 (0.3%)                   |
| <b>Possible AD</b>                                       | 18 (5.0%)                  |
| <b>Possible AD and VaD</b>                               | 1 (0.3%)                   |
| <b>Possible AD or VaD</b>                                | 1 (0.3%)                   |
| <b>Possible DLB</b>                                      | 1 (0.3%)                   |
| <b>Possible DLB, CBD, or MSA</b>                         | 1 (0.3%)                   |
| <b>Possible PD</b>                                       | 2 (0.6%)                   |
| <b>PPA due to FTD or AD</b>                              | 2 (0.6%)                   |
| <b>PPA NOS</b>                                           | 1 (0.3%)                   |
| <b>Probable AD</b>                                       | 44 (12.3%)                 |
| <b>Probable AD and DLB</b>                               | 2 (0.6%)                   |
| <b>Probable PD</b>                                       | 4 (1.1%)                   |
| <b>PSP</b>                                               | 3 (0.8%)                   |
| <b>VaD</b>                                               | 8 (2.2%)                   |

AD = Alzheimer's disease; ALS = amyotrophic lateral sclerosis; CBD = corticobasal degeneration; CvD = cerebrovascular disease; DLB = dementia with Lewy bodies; FTD = frontotemporal dementia; MSA = multiple system atrophy; NOS = not otherwise specified; NPH = normal pressure hydrocephalus; PD = Parkinson's disease; PLS = primary lateral sclerosis; PPA = primary progressive aphasia; PSP = progressive supranuclear palsy; VaD = vascular dementia.

**Table S4.** Results of the 5-fold cross-validated logistic regression model predicting *postmortem* cortical LBP

|                             | St. Estimate | Std. error | Z value | P value                 |
|-----------------------------|--------------|------------|---------|-------------------------|
| <i>Fold 1</i>               |              |            |         |                         |
| <b>Intercept</b>            | 10.73        | 1.79       | 5.99    | $2.16 \times 10^{-9}$   |
| <b>UPSIT score</b>          | -0.22        | 0.03       | -8.70   | $<2.00 \times 10^{-16}$ |
| <b>Age at time of UPSIT</b> | -0.09        | 0.02       | -4.4    | $1.07 \times 10^{-5}$   |
| <b>Sex (female)</b>         | -0.36        | 0.32       | -1.12   | 0.263                   |
| <i>Fold 2</i>               |              |            |         |                         |
| <b>Intercept</b>            | 13.20        | 2.06       | 6.41    | $1.48 \times 10^{-10}$  |
| <b>UPSIT score</b>          | -0.26        | 0.29       | -8.88   | $<2.00 \times 10^{-16}$ |
| <b>Age at time of UPSIT</b> | -0.11        | 0.02       | -4.83   | $1.35 \times 10^{-6}$   |
| <b>Sex (female)</b>         | -0.54        | 0.34       | -1.60   | 0.110                   |
| <i>Fold 3</i>               |              |            |         |                         |
| <b>Intercept</b>            | 11.49        | 1.85       | 6.21    | $5.40 \times 10^{-10}$  |
| <b>UPSIT score</b>          | -0.21        | 0.02       | -8.69   | $<2.00 \times 10^{-16}$ |
| <b>Age at time of UPSIT</b> | -0.10        | 0.02       | -4.80   | $1.58 \times 10^{-6}$   |
| <b>Sex (female)</b>         | 0.03         | 0.32       | 0.08    | 0.934                   |
| <i>Fold 4</i>               |              |            |         |                         |
| <b>Intercept</b>            | 10.90        | 1.88       | 5.78    | $7.37 \times 10^{-9}$   |
| <b>UPSIT score</b>          | -0.22        | 0.03       | -8.60   | $<2.00 \times 10^{-16}$ |
| <b>Age at time of UPSIT</b> | -0.09        | 0.02       | -4.33   | $1.51 \times 10^{-5}$   |
| <b>Sex (female)</b>         | -0.28        | 0.32       | -0.89   | 0.372                   |
| <i>Fold 5</i>               |              |            |         |                         |
| <b>Intercept</b>            | 10.40        | 1.76       | 5.91    | $3.45 \times 10^{-9}$   |
| <b>UPSIT score</b>          | -0.21        | 0.02       | -8.73   | $<2.00 \times 10^{-16}$ |
| <b>Age at time of UPSIT</b> | -0.09        | 0.02       | -4.29   | $1.77 \times 10^{-5}$   |
| <b>Sex (female)</b>         | -0.39        | 0.32       | -1.20   | 0.230                   |

Two-sided 5-fold cross-validated logistic regression model predicting *postmortem* cortical Lewy body pathology with UPSIT scores, age at time of UPSIT, and sex as predictors. Data correspond to the model across 1000 iterations that yielded median accuracy. Results are shown for each fold separately. Estimates are standardized. LBP = Lewy body pathology; st = standard; std = standardized; UPSIT = University of Pennsylvania Smell Identification Test.

**Table S5.** Two-step workflow performance for detecting cortical LB pathology

| Approach                            | Sensitivity | Median accuracy (CI) | Median PPV (CI)  | Median NPV (CI)  | Median TP (CI) | Median FP (CI) | Median TN (CI) | Median FN (CI) |
|-------------------------------------|-------------|----------------------|------------------|------------------|----------------|----------------|----------------|----------------|
| <i>Whole cohort</i>                 |             |                      |                  |                  |                |                |                |                |
| Two-step                            | 80%         | 0.91 (0.90-0.92)     | 0.94 (0.93-0.95) | 0.89 (0.88-0.90) | 99 (96-102)    | 6 (5-7)        | 226 (225-227)  | 27 (24-30)     |
| Two-step                            | 85%         | 0.92 (0.91-0.93)     | 0.94 (0.94-0.95) | 0.92 (0.90-0.92) | 105 (102-107)  | 7 (6-7)        | 225 (225-226)  | 21 (19-24)     |
| Two-step                            | 90%         | 0.94 (0.93-0.94)     | 0.93 (0.92-0.94) | 0.94 (0.93-0.95) | 111 (109-113)  | 8 (7-9)        | 224 (223-225)  | 15 (13-17)     |
| Two-step                            | 95%         | 0.94 (0.93-0.95)     | 0.90 (0.89-0.92) | 0.96 (0.95-0.97) | 118 (115-119)  | 13 (11-15)     | 219 (217-221)  | 8 (7-11)       |
| UPSIT-only                          | 80%         | 0.81 (0.80-0.82)     | 0.71 (0.70-0.72) | 0.88 (0.87-0.89) | 100 (97-103)   | 41 (39-44)     | 191 (188-193)  | 26 (23-29)     |
| UPSIT-only                          | 85%         | 0.81 (0.80-0.82)     | 0.69 (0.68-0.71) | 0.90 (0.89-0.92) | 106 (103-109)  | 47 (44-51)     | 185 (181-188)  | 20 (17-23)     |
| UPSIT-only                          | 90%         | 0.79 (0.79-0.80)     | 0.65 (0.64-0.66) | 0.93 (0.92-0.94) | 113 (111-115)  | 61 (57-64)     | 171 (168-175)  | 13 (11-15)     |
| UPSIT-only                          | 95%         | 0.74 (0.72-0.76)     | 0.58 (0.57-0.60) | 0.96 (0.94-0.97) | 120 (117-121)  | 86 (80-92)     | 146 (140-152)  | 6 (5-9)        |
| CSF-only                            | -           | 0.92 (0.89-0.94)     | 0.82 (0.76-0.88) | 0.99 (0.98-1.00) | 125 (108-142)  | 28 (18-38)     | 204 (186-221)  | 2 (0-5)        |
| <i>Clinical parkinsonism</i>        |             |                      |                  |                  |                |                |                |                |
| Two-step                            | 80%         | 0.92 (0.90-0.93)     | 1.00 (0.99-1.00) | 0.82 (0.79-0.85) | 82 (79-84)     | 0 (0-1)        | 56 (55-56)     | 12 (10-15)     |
| Two-step                            | 85%         | 0.93 (0.92-0.95)     | 0.99 (0.99-1.00) | 0.86 (0.83-0.89) | 85 (83-87)     | 1 (0-1)        | 55 (55-56)     | 9 (7-11)       |
| Two-step                            | 90%         | 0.95 (0.94-0.97)     | 0.99 (0.98-0.99) | 0.90 (0.89-0.93) | 88 (87-90)     | 1 (1-2)        | 55 (54-55)     | 6 (4-7)        |
| Two-step                            | 95%         | 0.95 (0.95-0.97)     | 0.96 (0.95-0.98) | 0.95 (0.93-0.96) | 91 (90-92)     | 4 (2-5)        | 52 (51-54)     | 3 (2-4)        |
| UPSIT-only                          | 80%         | 0.86 (0.84-0.87)     | 0.90 (0.88-0.90) | 0.81 (0.77-0.84) | 83 (80-85)     | 9 (9-11)       | 47 (45-47)     | 11 (9-14)      |
| UPSIT-only                          | 85%         | 0.87 (0.85-0.89)     | 0.89 (0.87-0.90) | 0.86 (0.82-0.90) | 87 (84-89)     | 11 (10-13)     | 45 (43-46)     | 7 (5-10)       |
| UPSIT-only                          | 90%         | 0.87 (0.86-0.89)     | 0.86 (0.84-0.87) | 0.91 (0.89-0.95) | 90 (89-92)     | 15 (13-17)     | 41 (39-43)     | 4 (2-5)        |
| UPSIT-only                          | 95%         | 0.85 (0.83-0.87)     | 0.81 (0.79-0.83) | 0.97 (0.94-1.00) | 93 (92-94)     | 22 (19-25)     | 34 (31-37)     | 1 (0-2)        |
| CSF-only                            | -           | 0.95 (0.92-0.98)     | 0.95 (0.90-0.99) | 0.96 (0.91-1.00) | 92 (80-104)    | 5 (1-9)        | 51 (40-63)     | 2 (0-5)        |
| <i>Clinical Alzheimer's disease</i> |             |                      |                  |                  |                |                |                |                |
| Two-step                            | 80%         | 0.89 (0.88-0.91)     | 0.83 (0.82-0.87) | 0.91 (0.89-0.93) | 19 (18-21)     | 4 (3-4)        | 67 (67-68)     | 7 (5-8)        |
| Two-step                            | 85%         | 0.91 (0.90-0.93)     | 0.84 (0.83-0.85) | 0.93 (0.92-0.96) | 21 (20-23)     | 4 (4-4)        | 67 (67-67)     | 5 (3-6)        |
| Two-step                            | 90%         | 0.95 (0.92-0.95)     | 0.86 (0.83-0.86) | 0.99 (0.96-0.99) | 25 (23-25)     | 4 (4-5)        | 67 (66-67)     | 1 (1-3)        |

|                              |     |                  |                  |                  |            |            |            |         |
|------------------------------|-----|------------------|------------------|------------------|------------|------------|------------|---------|
| Two-step                     | 95% | 0.94 (0.93-0.94) | 0.83 (0.81-0.83) | 0.99 (0.99-0.99) | 25 (25-25) | 5 (5-6)    | 66 (65-66) | 1 (1-1) |
| UPSIT-only                   | 80% | 0.71 (0.69-0.73) | 0.48 (0.45-0.50) | 0.88 (0.86-0.91) | 19 (18-21) | 21 (19-23) | 50 (48-52) | 7 (5-8) |
| UPSIT-only                   | 85% | 0.70 (0.67-0.72) | 0.47 (0.44-0.49) | 0.90 (0.88-0.94) | 21 (20-23) | 25 (23-26) | 46 (45-48) | 5 (3-6) |
| UPSIT-only                   | 90% | 0.69 (0.67-0.71) | 0.46 (0.44-0.48) | 0.98 (0.93-0.98) | 25 (23-25) | 28 (27-30) | 43 (41-44) | 1 (1-3) |
| UPSIT-only                   | 95% | 0.60 (0.57-0.63) | 0.40 (0.38-0.42) | 0.97 (0.97-0.97) | 25 (25-25) | 38 (35-41) | 33 (30-36) | 1 (1-1) |
| CSF-only                     | -   | 0.92 (0.86-0.97) | 0.76 (0.62-0.90) | 1.00 (1.00-1.00) | 26 (18-35) | 8 (3-14)   | 65 (53-72) | 0 (0-0) |
| <i>Clinically unimpaired</i> |     |                  |                  |                  |            |            |            |         |
| Two-step                     | 80% | 0.91 (0.91-0.91) | 1.00 (1.00-1.00) | 0.91 (0.91-0.91) | 1 (1-1)    | 0 (0-0)    | 39 (39-39) | 4 (4-4) |
| Two-step                     | 85% | 0.91 (0.91-0.91) | 1.00 (1.00-1.00) | 0.91 (0.91-0.91) | 1 (1-1)    | 0 (0-0)    | 39 (39-39) | 4 (4-4) |
| Two-step                     | 90% | 0.89 (0.89-0.91) | 0.50 (0.50-1.00) | 0.91 (0.91-0.91) | 1 (1-1)    | 1 (0-1)    | 38 (38-39) | 4 (4-4) |
| Two-step                     | 95% | 0.93 (0.91-0.93) | 0.75 (0.67-0.75) | 0.95 (0.93-0.95) | 3 (2-3)    | 1 (1-1)    | 38 (38-38) | 2 (2-3) |
| UPSIT-only                   | 80% | 0.89 (0.89-0.89) | 0.50 (0.50-0.50) | 0.91 (0.91-0.91) | 1 (1-1)    | 1 (1-1)    | 38 (38-38) | 4 (4-4) |
| UPSIT-only                   | 85% | 0.89 (0.84-0.89) | 0.50 (0.25-0.50) | 0.91 (0.90-0.91) | 1 (1-1)    | 1 (1-3)    | 38 (36-38) | 4 (4-4) |
| UPSIT-only                   | 90% | 0.82 (0.80-0.86) | 0.20 (0.17-0.33) | 0.90 (0.90-0.90) | 1 (1-1)    | 4 (2-5)    | 35 (34-37) | 4 (4-4) |
| UPSIT-only                   | 95% | 0.80 (0.77-0.82) | 0.30 (0.20-0.33) | 0.94 (0.91-0.94) | 3 (2-3)    | 7 (6-8)    | 32 (31-33) | 2 (2-3) |
| CSF-only                     | -   | 0.86 (0.75-0.96) | 0.44 (0.17-0.75) | 1.00 (1.00-1.00) | 5 (1-9)    | 6 (2-11)   | 33 (27-38) | 0 (0-0) |

Data correspond to the model across 1000 iterations, yielding median accuracy. The 95% confidence interval is shown across 1000 iterations.  
 FN = false negative; FP = false positive; NPV = negative predictive value; PPV = positive predictive value; TN = true negative; TP = true positive.

**Table S6.** Model-based risk stratification for LBP<sub>any</sub>-status

| Whole cohort           |     |                      |                      | Clinical parkinsonism |                      |                      | Clinical AD |                      |                      | Clinically unimpaired |                      |                      |
|------------------------|-----|----------------------|----------------------|-----------------------|----------------------|----------------------|-------------|----------------------|----------------------|-----------------------|----------------------|----------------------|
|                        | All | LBP <sub>any</sub> - | LBP <sub>any</sub> + | All                   | LBP <sub>any</sub> - | LBP <sub>any</sub> + | All         | LBP <sub>any</sub> - | LBP <sub>any</sub> + | All                   | LBP <sub>any</sub> - | LBP <sub>any</sub> + |
| <i>80% sensitivity</i> |     |                      |                      |                       |                      |                      |             |                      |                      |                       |                      |                      |
| <b>Low risk</b>        | 152 | 137 (90.1)           | 35 (9.9)             | 39                    | 32 (82.1)            | 7 (17.9)             | 41          | 31 (75.6)            | 10 (24.4)            | 37                    | 29 (78.4)            | 8 (21.6)             |
| <b>High risk</b>       | 186 | 51 (27.4)            | 135 (72.6)           | 111                   | 12 (10.8)            | 99 (89.2)            | 56          | 23 (41.1)            | 33 (58.9)            | 7                     | 5 (71.4)             | 2 (28.6)             |
| <i>85% sensitivity</i> |     |                      |                      |                       |                      |                      |             |                      |                      |                       |                      |                      |
| <b>Low risk</b>        | 144 | 120 (83.3)           | 24 (16.7)            | 32                    | 29 (90.6)            | 3 (9.4)              | 31          | 23 (74.2)            | 8 (25.8)             | 34                    | 28 (82.4)            | 6 (17.6)             |
| <b>High risk</b>       | 214 | 68 (31.8)            | 146 (68.2)           | 118                   | 15 (12.7)            | 103 (87.3)           | 66          | 31 (47.0)            | 35 (53.0)            | 10                    | 6 (60.0)             | 4 (40.0)             |
| <i>90% sensitivity</i> |     |                      |                      |                       |                      |                      |             |                      |                      |                       |                      |                      |
| <b>Low risk</b>        | 113 | 95 (84.1)            | 18 (15.9)            | 23                    | 21 (91.3)            | 2 (8.7)              | 23          | 16 (69.6)            | 6 (30.4)             | 31                    | 25 (80.6)            | 6 (19.4)             |
| <b>High risk</b>       | 245 | 93 (38.0)            | 152 (62.0)           | 127                   | 23 (18.1)            | 105 (81.9)           | 75          | 38 (50.7)            | 37 (49.3)            | 13                    | 9 (69.2)             | 4 (30.8)             |
| <i>95% sensitivity</i> |     |                      |                      |                       |                      |                      |             |                      |                      |                       |                      |                      |
| <b>Low risk</b>        | 52  | 44 (84.6)            | 8 (15.4)             | 7                     | 6 (85.7)             | 1 (14.3)             | 11          | 9 (81.8)             | 2 (19.2)             | 17                    | 13 (76.5)            | 4 (23.5)             |
| <b>High risk</b>       | 306 | 144 (47.1)           | 162 (52.9)           | 143                   | 38 (26.6)            | 105 (73.4)           | 86          | 45 (52.3)            | 41 (47.7)            | 27                    | 21 (77.8)            | 6 (22.2)             |

Data are presented as n or n (%). The first column indicates the evaluated strategies with different sensitivity-based thresholds for UPSIT-derived risk stratification. For each strategy, the total number of individuals in the low- and high-risk groups are shown, followed by numbers of Lewy body pathology negative (LBP-) and LBP+ participants according to *postmortem* neuropathology measures in any brain region (any). The percentage of LBP<sub>any</sub>-negatives in the low-risk group and the percentage of LBP<sub>any</sub>-positives in the high-risk group correspond to each evaluated threshold's NPV and PPV, respectively. AD = Alzheimer's disease; LBP = Lewy body pathology.



**Table S7.** Two-step workflow performance for detecting any LB pathology

| <b>Approach</b>                     | <b>Sensitivity</b> | <b>Median accuracy (CI)</b> | <b>Median PPV (CI)</b> | <b>Median NPV (CI)</b> | <b>Median TP (CI)</b> | <b>Median FP (CI)</b> | <b>Median TN (CI)</b> | <b>Median FN (CI)</b> |
|-------------------------------------|--------------------|-----------------------------|------------------------|------------------------|-----------------------|-----------------------|-----------------------|-----------------------|
| <i>Whole cohort</i>                 |                    |                             |                        |                        |                       |                       |                       |                       |
| Two-step                            | 80%                | 0.86 (0.85-0.87)            | 0.98 (0.98-0.98)       | 0.80 (0.79-0.81)       | 122 (120-125)         | 2 (2-3)               | 186 (185-186)         | 48 (45-50)            |
| Two-step                            | 85%                | 0.88 (0.87-0.88)            | 0.98 (0.97-0.99)       | 0.82 (0.81-0.83)       | 130 (128-132)         | 3 (2-4)               | 185 (184-186)         | 40 (38-42)            |
| Two-step                            | 90%                | 0.89 (0.88-0.89)            | 0.97 (0.96-0.97)       | 0.84 (0.83-0.84)       | 134 (132-136)         | 5 (4-6)               | 183 (182-184)         | 36 (34-38)            |
| Two-step                            | 95%                | 0.90 (0.90-0.91)            | 0.96 (0.96-0.96)       | 0.86 (0.85-0.87)       | 141 (139-142)         | 6 (6-6)               | 182 (182-182)         | 29 (28-31)            |
| UPSIT-only                          | 80%                | 0.76 (0.75-0.77)            | 0.73 (0.71-0.74)       | 0.80 (0.79-0.81)       | 136 (133-139)         | 52 (48-55)            | 136 (133-140)         | 34 (31-37)            |
| UPSIT-only                          | 85%                | 0.74 (0.72-0.75)            | 0.68 (0.66-0.69)       | 0.82 (0.81-0.84)       | 145 (142-147)         | 69 (65-74)            | 119 (114-123)         | 25 (23-28)            |
| UPSIT-only                          | 90%                | 0.69 (0.68-0.71)            | 0.62 (0.61-0.64)       | 0.85 (0.83-0.86)       | 153 (150-155)         | 92 (87-99)            | 96 (89-101)           | 17 (15-20)            |
| UPSIT-only                          | 95%                | 0.58 (0.56-0.59)            | 0.53 (0.52-0.54)       | 0.84 (0.80-0.87)       | 161 (159-163)         | 143 (138-148)         | 45 (40-50)            | 9 (7-11)              |
| CSF-only                            | -                  | 0.92 (0.89-0.94)            | 0.96 (0.93-0.99)       | 0.88 (0.84-0.92)       | 146 (128-163)         | 6 (2-11)              | 181 (164-200)         | 24 (15-33)            |
| <i>Clinical parkinsonism</i>        |                    |                             |                        |                        |                       |                       |                       |                       |
| Two-step                            | 80%                | 0.91 (0.89-0.92)            | 1.00 (0.99-1.00)       | 0.76 (0.74-0.79)       | 92 (91-94)            | 0 (0-1)               | 44 (43-44)            | 14 (12-15)            |
| Two-step                            | 85%                | 0.93 (0.92-0.93)            | 0.99 (0.99-1.00)       | 0.81 (0.79-0.82)       | 96 (94-96)            | 0 (0-1)               | 43 (43-44)            | 10 (10-12)            |
| Two-step                            | 90%                | 0.93 (0.93-0.93)            | 0.99 (0.99-0.99)       | 0.81 (0.81-0.81)       | 96 (96-96)            | 1 (1-1)               | 43 (43-43)            | 10 (10-10)            |
| Two-step                            | 95%                | 0.93 (0.93-0.93)            | 0.99 (0.99-0.99)       | 0.81 (0.81-0.81)       | 96 (96-96)            | 1 (1-1)               | 43 (43-43)            | 10 (10-10)            |
| UPSIT-only                          | 80%                | 0.89 (0.87-0.89)            | 0.91 (0.89-0.91)       | 0.83 (0.80-0.87)       | 99 (98-101)           | 10 (10-12)            | 34 (32-34)            | 7 (5-8)               |
| UPSIT-only                          | 85%                | 0.87 (0.86-0.89)            | 0.87 (0.85-0.89)       | 0.90 (0.85-0.91)       | 103 (101-102)         | 15 (13-18)            | 29 (26-31)            | 3 (3-5)               |
| UPSIT-only                          | 90%                | 0.83 (0.81-0.85)            | 0.82 (0.80-0.83)       | 0.91 (0.87-0.92)       | 104 (103-104)         | 23 (21-26)            | 21 (18-23)            | 2 (2-3)               |
| UPSIT-only                          | 95%                | 0.74 (0.73-0.75)            | 0.73 (0.73-0.75)       | 0.86 (0.75-0.89)       | 105 (104-105)         | 38 (36-38)            | 6 (6-8)               | 1 (1-2)               |
| CSF-only                            | -                  | 0.93 (0.89-0.96)            | 0.99 (0.97-1.00)       | 0.82 (0.71-0.90)       | 96 (84-108)           | 1 (0-3)               | 43 (32-54)            | 10 (5-16)             |
| <i>Clinical Alzheimer's disease</i> |                    |                             |                        |                        |                       |                       |                       |                       |
| Two-step                            | 80%                | 0.85 (0.84-0.85)            | 0.97 (0.97-0.97)       | 0.79 (0.78-0.79)       | 29 (28-29)            | 1 (1-1)               | 53 (53-53)            | 14 (14-15)            |
| Two-step                            | 85%                | 0.86 (0.85-0.86)            | 0.97 (0.97-0.97)       | 0.80 (0.79-0.80)       | 30 (29-30)            | 1 (1-1)               | 53 (53-53)            | 13 (13-14)            |
| Two-step                            | 90%                | 0.86 (0.86-0.86)            | 0.97 (0.97-0.97)       | 0.80 (0.80-0.80)       | 30 (30-30)            | 1 (1-1)               | 53 (53-53)            | 13 (13-13)            |

|                              |     |                  |                  |                  |            |            |            |            |
|------------------------------|-----|------------------|------------------|------------------|------------|------------|------------|------------|
| Two-step                     | 95% | 0.89 (0.88-0.89) | 0.97 (0.97-0.97) | 0.84 (0.83-0.84) | 33 (32-33) | 1 (1-1)    | 53 (53-53) | 10 (10-11) |
| UPSIT-only                   | 80% | 0.65 (0.62-0.67) | 0.58 (0.55-0.60) | 0.75 (0.73-0.76) | 33 (32-33) | 24 (22-26) | 30 (28-32) | 10 (10-11) |
| UPSIT-only                   | 85% | 0.60 (0.57-0.62) | 0.53 (0.51-0.55) | 0.73 (0.69-0.77) | 34 (33-36) | 30 (29-33) | 24 (21-25) | 9 (7-10)   |
| UPSIT-only                   | 90% | 0.55 (0.52-0.58) | 0.49 (0.47-0.51) | 0.73 (0.68-0.76) | 37 (36-37) | 38 (35-40) | 16 (14-19) | 6 (6-7)    |
| UPSIT-only                   | 95% | 0.50 (0.47-0.52) | 0.47 (0.46-0.48) | 0.76 (0.67-0.82) | 41 (39-41) | 46 (44-48) | 8 (6-10)   | 2 (2-4)    |
| CSF-only                     | -   | 0.89 (0.81-0.95) | 0.97 (0.91-1.00) | 0.84 (0.75-0.92) | 33 (24-43) | 1 (0-3)    | 53 (43-63) | 10 (5-16)  |
| <i>Clinically unimpaired</i> |     |                  |                  |                  |            |            |            |            |
| Two-step                     | 80% | 0.84 (0.82-0.86) | 1.00 (1.00-1.00) | 0.83 (0.81-0.85) | 3 (2-4)    | 0 (0-0)    | 34 (34-34) | 7 (6-8)    |
| Two-step                     | 85% | 0.86 (0.86-0.86) | 1.00 (1.00-1.00) | 0.85 (0.85-0.85) | 4 (4-4)    | 0 (0-0)    | 34 (34-34) | 6 (6-6)    |
| Two-step                     | 90% | 0.86 (0.84-0.86) | 1.00 (0.80-1.00) | 0.85 (0.85-0.87) | 4 (4-5)    | 0 (0-1)    | 34 (33-34) | 6 (5-6)    |
| Two-step                     | 95% | 0.89 (0.86-0.89) | 0.86 (0.83-0.86) | 0.89 (0.87-0.89) | 6 (5-6)    | 1 (1-1)    | 33 (33-33) | 4 (4-5)    |
| UPSIT-only                   | 80% | 0.73 (0.71-0.77) | 0.38 (0.29-0.50) | 0.81 (0.78-0.83) | 3 (2-4)    | 5 (3-6)    | 29 (28-31) | 7 (6-8)    |
| UPSIT-only                   | 85% | 0.73 (0.71-0.75) | 0.40 (0.36-0.44) | 0.82 (0.82-0.83) | 4 (4-4)    | 6 (5-7)    | 28 (27-29) | 6 (6-6)    |
| UPSIT-only                   | 90% | 0.66 (0.61-0.71) | 0.31 (0.27-0.36) | 0.81 (0.79-0.83) | 4 (4-5)    | 9 (7-11)   | 25 (23-27) | 6 (5-6)    |
| UPSIT-only                   | 95% | 0.43 (0.39-0.48) | 0.22 (0.19-0.24) | 0.77 (0.71-0.79) | 6 (5-6)    | 21 (19-23) | 13 (11-15) | 4 (4-5)    |
| CSF-only                     | -   | 0.98 (0.93-1.00) | 0.92 (0.69-1.00) | 1.00 (1.00-1.00) | 10 (5-15)  | 1 (0-3)    | 33 (27-38) | 0 (0-0)    |

Data correspond to the model across 1000 iterations, yielding median accuracy. The 95% confidence interval is shown across 1000 iterations. FN = false negative; FP = false positive; NPV = negative predictive value; PPV = positive predictive value; TN = true negative; TP = true positive.

**Table S8.** Model-based risk stratification for brainstem/limbic or neocortical LBP-status

| Whole cohort    |     |                       |                       | Clinical parkinsonism |                       |                       | Clinical AD |                       |                       | Clinically unimpaired |                       |                       |
|-----------------|-----|-----------------------|-----------------------|-----------------------|-----------------------|-----------------------|-------------|-----------------------|-----------------------|-----------------------|-----------------------|-----------------------|
| All             |     | LBP <sub>B/L-N-</sub> | LBP <sub>B/L-N+</sub> | All                   | LBP <sub>B/L-N-</sub> | LBP <sub>B/L-N+</sub> | All         | LBP <sub>B/L-N-</sub> | LBP <sub>B/L-N+</sub> | All                   | LBP <sub>B/L-N-</sub> | LBP <sub>B/L-N+</sub> |
| 80% sensitivity |     |                       |                       |                       |                       |                       |             |                       |                       |                       |                       |                       |
| Low risk        | 227 | 204 (89.9)            | 23 (10.1)             | 65                    | 52 (80.0)             | 13 (20.0)             | 58          | 54 (93.1)             | 4 (6.9)               | 42                    | 39 (92.9)             | 3 (7.1)               |
| High risk       | 131 | 47 (35.9)             | 84 (64.1)             | 85                    | 13 (15.3)             | 72 (84.7)             | 39          | 21 (53.8)             | 18 (46.2)             | 2                     | 2 (100.0)             | 0 (0.0)               |
| 85% sensitivity |     |                       |                       |                       |                       |                       |             |                       |                       |                       |                       |                       |
| Low risk        | 213 | 197 (93.0)            | 16 (7.0)              | 56                    | 50 (89.3)             | 6 (10.7)              | 53          | 49 (92.5)             | 4 (7.5)               | 42                    | 39 (92.9)             | 3 (7.1)               |
| High risk       | 145 | 54 (37.2)             | 91 (62.8)             | 94                    | 15 (16.0)             | 79 (84.0)             | 44          | 26 (59.1)             | 18 (40.9)             | 2                     | 2 (100.0)             | 0 (0.0)               |
| 90% sensitivity |     |                       |                       |                       |                       |                       |             |                       |                       |                       |                       |                       |
| Low risk        | 199 | 187 (94.0)            | 12 (6.0)              | 50                    | 47 (94.0)             | 3 (6.0)               | 49          | 45 (91.8)             | 4 (8.2)               | 41                    | 38 (92.7)             | 3 (7.3)               |
| High risk       | 159 | 64 (40.3)             | 95 (59.7)             | 100                   | 18 (18.0)             | 82 (82.0)             | 48          | 30 (62.5)             | 18 (37.5)             | 3                     | 3 (100.0)             | 0 (0.0)               |
| 95% sensitivity |     |                       |                       |                       |                       |                       |             |                       |                       |                       |                       |                       |
| Low risk        | 171 | 166 (97.1)            | 5 (2.9)               | 40                    | 39 (97.5)             | 1 (2.5)               | 40          | 39 (97.5)             | 1 (2.5)               | 37                    | 35 (94.6)             | 2 (5.4)               |
| High risk       | 187 | 85 (45.5)             | 102 (44.5)            | 110                   | 26 (23.6)             | 84 (76.4)             | 57          | 36 (63.2)             | 21 (36.8)             | 7                     | 6 (85.7)              | 1 (14.3)              |

Data are presented as n or n (%). The first column indicates the evaluated strategies with different sensitivity-based thresholds for UPSIT-derived risk stratification. For each strategy, the total number of individuals in the low- and high-risk groups are shown, followed by numbers of Lewy body pathology negative (LBP-) and LBP+ participants according to *postmortem* neuropathology measures corresponding to Unified Staging System for Lewy Body Disorders (USSLB) stages III. Brainstem/Limbic or IV. Neocortical (B/L-N). The percentage of LBP<sub>B/L-N-</sub>-negatives in the low-risk group and the percentage of LBP<sub>B/L-N-</sub>-positives in the high-risk group correspond to each evaluated threshold's NPV and PPV, respectively. AD = Alzheimer's disease; B/L-N = brainstem/limbic or neocortical; LBP = Lewy body pathology

**Table S9** Two-step workflow performance for detecting brainstem/limbic or neocortical LBP-status

| Approach                            | Sensitivity | Median accuracy (CI) | Median PPV (CI)  | Median NPV (CI)  | Median TP (CI) | Median FP (CI) | Median TN (CI) | Median FN (CI) |
|-------------------------------------|-------------|----------------------|------------------|------------------|----------------|----------------|----------------|----------------|
| <i>Whole cohort</i>                 |             |                      |                  |                  |                |                |                |                |
| Two-step                            | 80%         | 0.90 (0.89-0.91)     | 0.86 (0.84-0.88) | 0.92 (0.90-0.93) | 85 (82-88)     | 14 (12-16)     | 237 (235-239)  | 22 (19-25)     |
| Two-step                            | 85%         | 0.91 (0.90-0.91)     | 0.85 (0.83-0.86) | 0.93 (0.92-0.94) | 90 (87-93)     | 16 (15-18)     | 235 (233-236)  | 17 (14-20)     |
| Two-step                            | 90%         | 0.91 (0.91-0.92)     | 0.84 (0.83-0.85) | 0.95 (0.94-0.96) | 95 (93-97)     | 19 (17-20)     | 232 (231-234)  | 12 (10-14)     |
| Two-step                            | 95%         | 0.92 (0.91-0.92)     | 0.81 (0.80-0.82) | 0.97 (0.97-0.98) | 101 (99-102)   | 24 (22-26)     | 227 (225-229)  | 6 (5-8)        |
| UPSIT-only                          | 80%         | 0.81 (0.80-0.82)     | 0.65 (0.63-0.64) | 0.90 (0.89-0.91) | 85 (82-88)     | 46 (43-49)     | 205 (202-208)  | 22 (19-25)     |
| UPSIT-only                          | 85%         | 0.80 (0.79-0.82)     | 0.63 (0.62-0.64) | 0.92 (0.91-0.93) | 90 (87-93)     | 53 (50-56)     | 198 (195-201)  | 17 (14-20)     |
| UPSIT-only                          | 90%         | 0.79 (0.78-0.80)     | 0.60 (0.58-0.62) | 0.94 (0.93-0.95) | 96 (93-98)     | 64 (60-68)     | 187 (183-191)  | 11 (9-14)      |
| UPSIT-only                          | 95%         | 0.74 (0.73-0.75)     | 0.54 (0.53-0.55) | 0.97 (0.96-0.98) | 102 (100-103)  | 87 (82-91)     | 165 (160-169)  | 5 (4-7)        |
| CSF-only                            | -           | 0.86 (0.83-0.89)     | 0.69 (0.62-0.76) | 0.99 (0.98-1.00) | 105 (88-122)   | 47 (35-59)     | 204 (186-222)  | 2 (0-5)        |
| <i>Clinical parkinsonism</i>        |             |                      |                  |                  |                |                |                |                |
| Two-step                            | 80%         | 0.90 (0.88-0.92)     | 0.95 (0.95-0.96) | 0.85 (0.81-0.88) | 74 (71-77)     | 4 (3-4)        | 61 (61-62)     | 11 (8-14)      |
| Two-step                            | 85%         | 0.93 (0.91-0.94)     | 0.95 (0.94-0.95) | 0.91 (0.87-0.94) | 79 (76-81)     | 4 (4-5)        | 61 (60-61)     | 6 (4-9)        |
| Two-step                            | 90%         | 0.94 (0.93-0.95)     | 0.93 (0.92-0.94) | 0.95 (0.92-0.95) | 82 (80-82)     | 6 (5-7)        | 59 (58-60)     | 3 (3-5)        |
| Two-step                            | 95%         | 0.93 (0.91-0.94)     | 0.90 (0.88-0.91) | 0.97 (0.95-0.98) | 83 (82-84)     | 9 (8-11)       | 56 (54-57)     | 2 (1-3)        |
| UPSIT-only                          | 80%         | 0.84 (0.81-0.86)     | 0.85 (0.84-0.87) | 0.83 (0.79-0.86) | 74 (71-77)     | 13 (11-14)     | 52 (51-54)     | 11 (8-14)      |
| UPSIT-only                          | 85%         | 0.86 (0.84-0.87)     | 0.84 (0.83-0.85) | 0.89 (0.85-0.93) | 79 (76-81)     | 15 (14-16)     | 50 (49-51)     | 6 (4-9)        |
| UPSIT-only                          | 90%         | 0.86 (0.84-0.87)     | 0.82 (0.80-0.84) | 0.94 (0.90-0.96) | 82 (80-83)     | 18 (16-20)     | 47 (45-49)     | 3 (2-5)        |
| UPSIT-only                          | 95%         | 0.83 (0.81-0.84)     | 0.77 (0.75-0.78) | 0.98 (0.95-1.00) | 84 (83-85)     | 26 (4-28)      | 39 (37-41)     | 1 (0-2)        |
| CSF-only                            | -           | 0.91 (0.86-0.95)     | 0.87 (0.80-0.93) | 0.98 (0.94-1.00) | 84 (72-96)     | 13 (7-19)      | 52 (41-64)     | 1 (0-3)        |
| <i>Clinical Alzheimer's disease</i> |             |                      |                  |                  |                |                |                |                |
| Two-step                            | 80%         | 0.90 (0.88-0.91)     | 0.77 (0.73-0.81) | 0.93 (0.92-0.95) | 17 (16-18)     | 5 (4-6)        | 70 (69-71)     | 5 (4-6)        |
| Two-step                            | 85%         | 0.89 (0.88-0.91)     | 0.74 (0.69-0.78) | 0.94 (0.93-0.95) | 18 (17-18)     | 6 (5-8)        | 69 (67-70)     | 4 (4-5)        |
| Two-step                            | 90%         | 0.89 (0.88-0.91)     | 0.70 (0.69-0.74) | 0.96 (0.94-0.97) | 19 (18-20)     | 8 (7-8)        | 67 (67-68)     | 3 (2-4)        |

|                              |     |                  |                  |                  |            |            |            |         |
|------------------------------|-----|------------------|------------------|------------------|------------|------------|------------|---------|
| Two-step                     | 95% | 0.90 (0.89-0.91) | 0.70 (0.69-0.72) | 0.99 (0.97-0.99) | 21 (20-21) | 9 (8-9)    | 66 (66-67) | 1 (1-2) |
| UPSIT-only                   | 80% | 0.74 (0.71-0.76) | 0.46 (0.43-0.49) | 0.92 (0.90-0.93) | 17 (16-18) | 20 (18-23) | 55 (52-57) | 5 (4-6) |
| UPSIT-only                   | 85% | 0.70 (0.68-0.73) | 0.42 (0.40-0.45) | 0.93 (0.91-0.93) | 18 (17-18) | 24 (22-27) | 51 (48-53) | 4 (4-5) |
| UPSIT-only                   | 90% | 0.66 (0.64-0.69) | 0.39 (0.37-0.41) | 0.94 (0.92-0.96) | 19 (18-20) | 29 (27-31) | 46 (44-48) | 3 (2-4) |
| UPSIT-only                   | 95% | 0.61 (0.59-0.63) | 0.36 (0.35-0.38) | 0.97 (0.95-0.98) | 21 (20-21) | 37 (34-39) | 38 (36-41) | 1 (1-2) |
| CSF-only                     | -   | 0.86 (0.78-0.93) | 0.61 (0.46-0.79) | 0.99 (0.95-1.00) | 21 (13-29) | 13 (6-19)  | 62 (52-71) | 1 (0-3) |
| <i>Clinically unimpaired</i> |     |                  |                  |                  |            |            |            |         |
| Two-step                     | 80% | 0.91 (0.91-0.91) | 0.00 (0.00-0.00) | 0.93 (0.93-0.93) | 0 (0-0)    | 1 (1-1)    | 40 (40-40) | 3 (3-3) |
| Two-step                     | 85% | 0.91 (0.91-0.91) | 0.00 (0.00-0.00) | 0.93 (0.93-0.93) | 0 (0-0)    | 1 (1-1)    | 40 (40-40) | 3 (3-3) |
| Two-step                     | 90% | 0.91 (0.91-0.91) | 0.00 (0.00-0.00) | 0.93 (0.93-0.93) | 0 (0-0)    | 1 (1-1)    | 40 (40-40) | 3 (3-3) |
| Two-step                     | 95% | 0.89 (0.89-0.93) | 0.00 (0.00-0.50) | 0.93 (0.93-0.98) | 0 (0-2)    | 2 (1-2)    | 39 (39-40) | 3 (1-3) |
| UPSIT-only                   | 80% | 0.89 (0.89-0.89) | 0.00 (0.00-0.00) | 0.93 (0.93-0.93) | 0 (0-0)    | 2 (2-2)    | 39 (39-39) | 3 (3-3) |
| UPSIT-only                   | 85% | 0.89 (0.89-0.89) | 0.00 (0.00-0.00) | 0.93 (0.93-0.93) | 0 (0-0)    | 2 (2-2)    | 39 (39-39) | 3 (3-3) |
| UPSIT-only                   | 90% | 0.86 (0.84-0.89) | 0.00 (0.00-0.00) | 0.93 (0.93-0.93) | 0 (0-0)    | 3 (2-4)    | 38 (37-39) | 3 (3-3) |
| UPSIT-only                   | 95% | 0.80 (0.77-0.84) | 0.00 (0.00-0.00) | 0.92 (0.92-0.97) | 0 (0-2)    | 7 (5-7)    | 34 (34-36) | 3 (1-3) |
| CSF-only                     | -   | 0.82 (0.71-0.93) | 0.00 (0.00-1.00) | 1.00 (1.00-1.00) | 3 (0-7)    | 8 (3-13)   | 33 (27-38) | 0 (0-0) |

Data correspond to the model across 1000 iterations, yielding median accuracy. The 95% confidence interval is shown across 1000 iterations.  
 FN = false negative; FP = false positive; NPV = negative predictive value; PPV = positive predictive value; TN = true negative; TP = true positive.

**Table S10.** Two-step workflow performance for detecting cortical LB pathology in individuals with UPSIT within 5 years of death

| Approach                            | Sensitivity | Median accuracy (CI) | Median PPV (CI)  | Median NPV (CI)  | Median TP (CI) | Median FP (CI) | Median TN (CI) | Median FN (CI) |
|-------------------------------------|-------------|----------------------|------------------|------------------|----------------|----------------|----------------|----------------|
| <i>Whole cohort</i>                 |             |                      |                  |                  |                |                |                |                |
| Two-step                            | 80%         | 0.92 (0.90-0.93)     | 0.95 (0.95-0.98) | 0.90 (0.88-0.91) | 80 (77-83)     | 4 (2-4)        | 188 (188-190)  | 22 (19-25)     |
| Two-step                            | 85%         | 0.93 (0.92-0.94)     | 0.96 (0.95-0.97) | 0.92 (0.90-0.93) | 85 (82-88)     | 4 (3-4)        | 188 (188-189)  | 17 (14-20)     |
| Two-step                            | 90%         | 0.95 (0.94-0.95)     | 0.95 (0.94-0.96) | 0.94 (0.93-0.95) | 91 (88-93)     | 5 (4-6)        | 187 (186-188)  | 11 (9-14)      |
| Two-step                            | 95%         | 0.94 (0.93-0.95)     | 0.89 (0.87-0.92) | 0.97 (0.96-0.97) | 96 (94-97)     | 12 (9-15)      | 180 (177-183)  | 6 (5-8)        |
| UPSIT-only                          | 80%         | 0.82 (0.81-0.83)     | 0.72 (0.70-0.73) | 0.89 (0.87-0.90) | 81 (78-84)     | 32 (30-35)     | 160 (157-162)  | 21 (18-24)     |
| UPSIT-only                          | 85%         | 0.82 (0.80-0.83)     | 0.69 (0.67-0.71) | 0.91 (0.89-0.92) | 86 (83-89)     | 38 (35-42)     | 154 (150-157)  | 16 (13-19)     |
| UPSIT-only                          | 90%         | 0.79 (0.78-0.80)     | 0.64 (0.62-0.66) | 0.93 (0.92-0.95) | 92 (89-94)     | 52 (48-55)     | 140 (137-144)  | 10 (8-13)      |
| UPSIT-only                          | 95%         | 0.69 (0.65-0.72)     | 0.53 (0.50-0.56) | 0.96 (0.94-0.97) | 97 (95-98)     | 87 (76-99)     | 105 (93-116)   | 5 (4-7)        |
| CSF-only                            | -           | 0.92 (0.88-0.95)     | 0.81 (0.73-0.88) | 0.99 (0.98-1.00) | 101 (85-118)   | 24 (15-34)     | 168 (151-185)  | 1 (0-3)        |
| <i>Clinical parkinsonism</i>        |             |                      |                  |                  |                |                |                |                |
| Two-step                            | 80%         | 0.90 (0.87-0.92)     | 1.00 (1.00-1.00) | 0.77 (0.73-0.80) | 65 (62-67)     | 0 (0-0)        | 41 (41-41)     | 12 (10-15)     |
| Two-step                            | 85%         | 0.93 (0.91-0.95)     | 1.00 (1.00-1.00) | 0.84 (0.79-0.87) | 69 (66-71)     | 0 (0-0)        | 41 (41-41)     | 8 (6-11)       |
| Two-step                            | 90%         | 0.96 (0.94-0.98)     | 1.00 (0.99-1.00) | 0.89 (0.85-0.93) | 72 (70-74)     | 0 (0-1)        | 41 (40-41)     | 5 (3-7)        |
| Two-step                            | 95%         | 0.96 (0.94-0.98)     | 0.96 (0.95-0.99) | 0.95 (0.93-0.98) | 75 (74-76)     | 3 (1-4)        | 38 (37-40)     | 2 (1-3)        |
| UPSIT-only                          | 80%         | 0.84 (0.81-0.86)     | 0.89 (0.88-0.91) | 0.75 (0.70-0.79) | 66 (63-68)     | 8 (7-9)        | 33 (32-34)     | 11 (9-14)      |
| UPSIT-only                          | 85%         | 0.86 (0.84-0.88)     | 0.89 (0.86-0.90) | 0.82 (0.76-0.87) | 70 (67-72)     | 9 (8-11)       | 32 (30-33)     | 7 (5-10)       |
| UPSIT-only                          | 90%         | 0.86 (0.84-0.87)     | 0.85 (0.83-0.87) | 0.88 (0.83-0.93) | 73 (71-75)     | 13 (11-15)     | 28 (26-30)     | 4 (2-6)        |
| UPSIT-only                          | 95%         | 0.81 (0.77-0.84)     | 0.78 (0.74-0.81) | 0.96 (0.90-1.00) | 76 (75-77)     | 22 (18-27)     | 19 (14-23)     | 1 (0-2)        |
| CSF-only                            | -           | 0.96 (0.92-0.99)     | 0.95 (0.90-0.99) | 0.97 (0.91-1.00) | 76 (66-86)     | 4 (1-8)        | 37 (28-47)     | 1 (0-3)        |
| <i>Clinical Alzheimer's disease</i> |             |                      |                  |                  |                |                |                |                |
| Two-step                            | 80%         | 0.93 (0.92-0.95)     | 0.88 (0.87-0.93) | 0.93 (0.93-0.95) | 13 (13-14)     | 2 (1-2)        | 55 (55-56)     | 4 (3-4)        |
| Two-step                            | 85%         | 0.93 (0.92-0.95)     | 0.88 (0.87-0.93) | 0.95 (0.93-0.97) | 14 (13-15)     | 2 (1-2)        | 55 (55-55)     | 3 (2-4)        |
| Two-step                            | 90%         | 0.95 (0.93-0.96)     | 0.88 (0.83-0.89) | 0.98 (0.95-0.98) | 16 (14-16)     | 2 (2-3)        | 55 (54-55)     | 1 (1-3)        |

|                              |     |                  |                  |                  |            |            |            |         |
|------------------------------|-----|------------------|------------------|------------------|------------|------------|------------|---------|
| Two-step                     | 95% | 0.93 (0.92-0.95) | 0.80 (0.76-0.84) | 0.98 (0.98-0.98) | 16 (16-16) | 4 (3-5)    | 53 (52-54) | 1 (1-1) |
| UPSIT-only                   | 80% | 0.74 (0.72-0.77) | 0.46 (0.43-0.50) | 0.91 (0.91-0.94) | 13 (13-14) | 15 (13-18) | 42 (39-44) | 4 (3-4) |
| UPSIT-only                   | 85% | 0.70 (0.68-0.74) | 0.42 (0.39-0.47) | 0.93 (0.91-0.95) | 14 (13-15) | 19 (16-21) | 38 (36-41) | 3 (2-4) |
| UPSIT-only                   | 90% | 0.68 (0.64-0.70) | 0.41 (0.38-0.43) | 0.97 (0.92-0.97) | 16 (14-16) | 23 (21-25) | 34 (32-36) | 1 (1-3) |
| UPSIT-only                   | 95% | 0.51 (0.45-0.57) | 0.31 (0.29-0.34) | 0.96 (0.94-0.96) | 16 (16-16) | 35 (31-40) | 22 (17-26) | 1 (1-1) |
| CSF-only                     | -   | 0.93 (0.88-0.99) | 0.78 (0.59-0.95) | 1.00 (1.00-1.00) | 17 (10-25) | 5 (1-9)    | 52 (44-59) | 0 (0-0) |
| <i>Clinically unimpaired</i> |     |                  |                  |                  |            |            |            |         |
| Two-step                     | 80% | 0.90 (0.90-0.90) | 1.00 (1.00-1.00) | 0.90 (0.90-0.90) | 1 (1-1)    | 0 (0-0)    | 35 (35-35) | 4 (4-4) |
| Two-step                     | 85% | 0.90 (0.90-0.90) | 1.00 (1.00-1.00) | 0.90 (0.90-0.90) | 1 (1-1)    | 0 (0-0)    | 35 (35-35) | 4 (4-4) |
| Two-step                     | 90% | 0.88 (0.88-0.90) | 0.50 (0.50-1.00) | 0.90 (0.90-0.90) | 1 (1-1)    | 1 (0-1)    | 34 (34-35) | 4 (4-4) |
| Two-step                     | 95% | 0.90 (0.88-0.93) | 0.67 (0.50-0.75) | 0.94 (0.90-0.94) | 3 (1-3)    | 1 (1-2)    | 34 (33-34) | 2 (2-4) |
| UPSIT-only                   | 80% | 0.90 (0.90-0.90) | 1.00 (1.00-1.00) | 0.90 (0.90-0.90) | 1 (1-1)    | 0 (0-0)    | 35 (35-35) | 4 (4-4) |
| UPSIT-only                   | 85% | 0.90 (0.85-0.90) | 1.00 (0.33-1.00) | 0.90 (0.89-0.90) | 1 (1-1)    | 0 (0-2)    | 35 (33-35) | 4 (4-4) |
| UPSIT-only                   | 90% | 0.83 (0.80-0.88) | 0.25 (0.20-0.50) | 0.89 (0.89-0.90) | 1 (1-1)    | 3 (1-4)    | 32 (31-34) | 4 (4-4) |
| UPSIT-only                   | 95% | 0.78 (0.70-0.83) | 0.27 (0.14-0.38) | 0.93 (0.88-0.94) | 3 (1-3)    | 7 (5-9)    | 28 (26-30) | 2 (2-4) |
| CSF-only                     | -   | 0.85 (0.75-0.95) | 0.46 (0.14-0.78) | 1.00 (1.00-1.00) | 5 (1-10)   | 6 (2-10)   | 29 (23-35) | 0 (0-0) |

294 individuals were included. Data correspond to the model across 1000 iterations, yielding median accuracy. The 95% confidence interval is shown across 1000 iterations. FN = false negative; FP = false positive; NPV = negative predictive value; PPV = positive predictive value; TN = true negative; TP = true positive.

**Table S11.** PPMI cohort characteristics at baseline

|                                           | <b>Whole cohort<br/>(N=1209)</b> |
|-------------------------------------------|----------------------------------|
| <b>Age, years</b>                         | 65.1 (8.7)                       |
| <b>Sex, n female</b>                      | 566 (46.8%)                      |
| <b>UPSIT score</b>                        | 23.9 (8.2)                       |
| <b>CSF SAA+, n</b>                        | 832 (68.8%)                      |
| <b>Primary clinical diagnosis</b>         |                                  |
| Idiopathic PD                             | 674 (55.7%)                      |
| Alzheimer's disease                       | 2 (0.2%)                         |
| Corticobasal syndrome                     | 1 (0.1%)                         |
| Dementia with Lewy bodies                 | 5 (0.4%)                         |
| Essential tremor                          | 20 (1.7%)                        |
| Juvenile autosomal recessive parkinsonsim | 1 (0.1%)                         |
| Control                                   | 470 (38.9%)                      |
| Spinocerebellar Ataxia                    | 1 (0.1%)                         |
| Other neurological disorder(s)            | 1 (0.1%)                         |

CSF = cerebrospinal fluid; PD = Parkinson's disease; SAA = Seed Amplification Assay; UPSIT = University of Pennsylvania Smell Identification Test.



**Table S12.** Non-degenerative confounders of olfactory function in false positives and true positives based on UPSIT risk-stratification

|                                          | <b>False positive<br/>(N=107)</b> | <b>True positive<br/>(N=131)</b> | <b><i>P</i> value</b> |
|------------------------------------------|-----------------------------------|----------------------------------|-----------------------|
| <b>Smoking</b> (>0 cigarettes a day)     |                                   |                                  | 0.188                 |
| No                                       | 44 (41.1%)                        | 76 (58.0%)                       |                       |
| Yes                                      | 63 (58.9%)                        | 55 (42.0%)                       |                       |
| <b>Alcohol</b> (>0 units per day)        |                                   |                                  | 0.173                 |
| No                                       | 75 (70.1%)                        | 107 (81.7%)                      |                       |
| Yes                                      | 32 (29.9%)                        | 24 (18.3%)                       |                       |
| <b>History of traumatic brain injury</b> |                                   |                                  | 0.620                 |
| No                                       | 83 (77.6%)                        | 104 (79.4%)                      |                       |
| Yes                                      | 24 (22.4%)                        | 27 (20.6%)                       |                       |
| <b>History of sinusitis / rhinitis</b>   |                                   |                                  | 0.176                 |
| No                                       | 78 (72.9%)                        | 98 (74.8%)                       |                       |
| Yes                                      | 29 (27.1%)                        | 33 (25.2%)                       |                       |

Presence of potential confounders of olfactory impairment. *P* values indicates results from two-sided chi-squared tests.

**Figure S1.** *Antemortem* UPSIT scores across *postmortem* Lewy body pathology

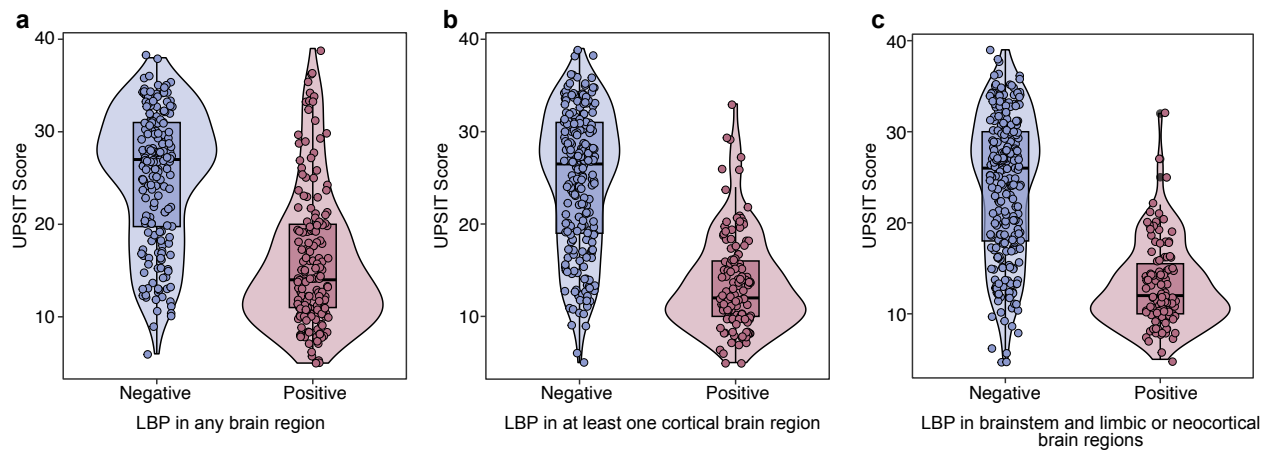

Boxplots showing UPSIT scores for LB-/LB+ groups, measured as **(a)** any brain region showing Lewy body pathology, **(b)** any cortical brain region showing Lewy body pathology, and **(c)** Lewy body pathology corresponding to Unified Staging System for Lewy Body Disorders (USSLB) stages III. Brainstem/Limbic or IV. Neocortical. Boxplots show the median, lower, and upper quartiles with whiskers representing minimum and maximum values. Source data are provided as a Source Data file. LBP = Lewy body pathology; UPSIT = University of Pennsylvania Smell Identification Test.

**Figure S2.** UPSIT-based risk classification according to lenient and stringent probability thresholds

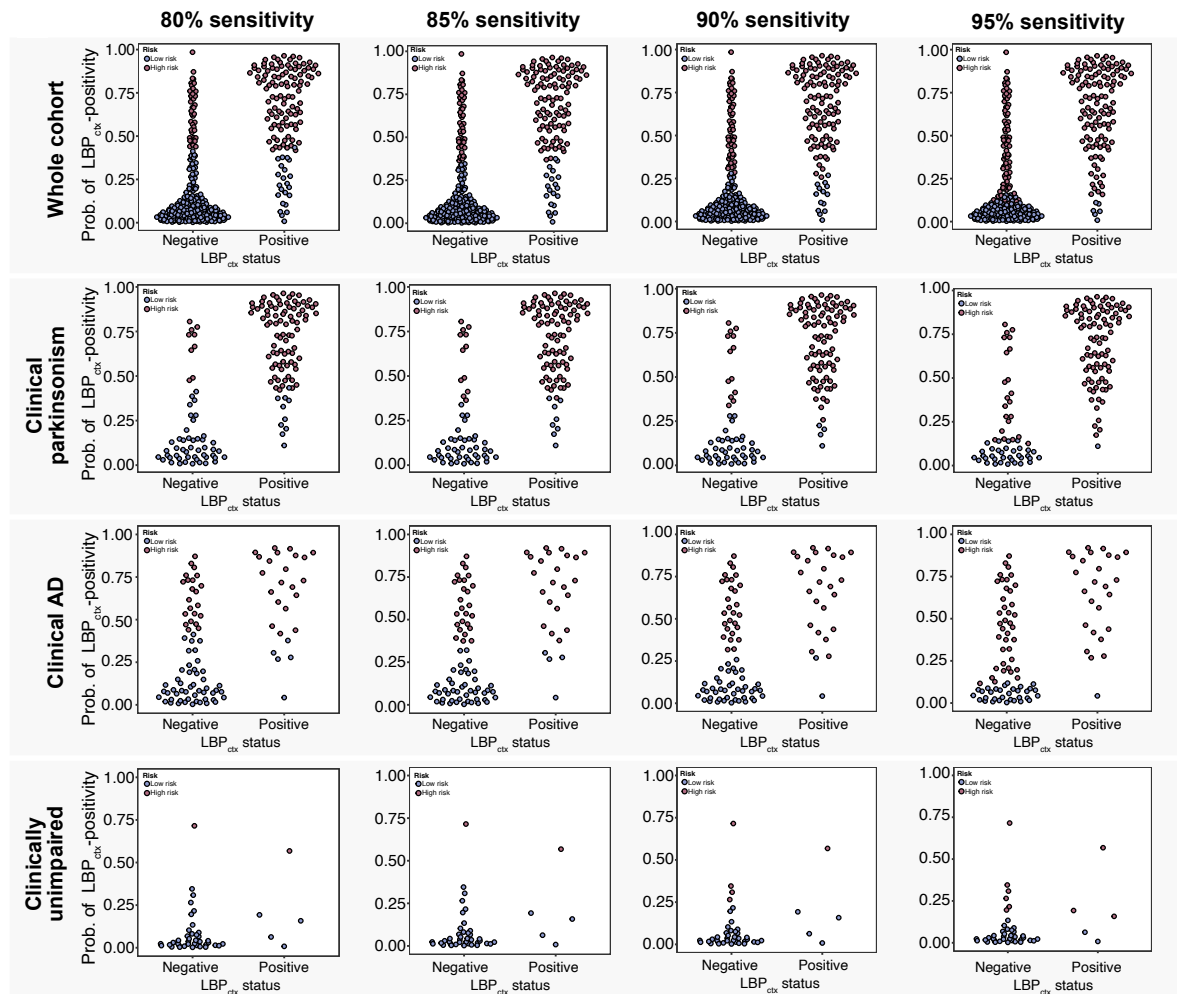

Distribution of predicted probabilities of cortical Lewy body pathology (LBP<sub>ctx</sub>) positivity based on a logistic regression model including UPSIT scores, age, and sex as predictors. Probability thresholds with 80%, 85%, 90%, and 95% sensitivity were used to classify individuals as low (blue dots) or high (red dots) risk of having cortical LBP. ctx = cortex; LBP = Lewy body pathology; UPSIT = University of Pennsylvania Smell Identification Test.

**Figure S3.**Results summary against any and brainstem/limbic or neocortical LBP status

**a**

| Patient population                                                                    |   | Smell test-based high risk<br>(95% sensitivity) |   | Lewy body positivity based on<br>CSF SAA in <u>high risk group</u> |   | Lewy body positivity based on<br><i>postmortem</i> neuropathology in<br><u>high risk CSF SAA positive group</u> |   | Reduction in CSF tests |
|---------------------------------------------------------------------------------------|---|-------------------------------------------------|---|--------------------------------------------------------------------|---|-----------------------------------------------------------------------------------------------------------------|---|------------------------|
| Whole cohort,<br><i>n</i> = 358, 47.5% LBP <sub>any</sub> <sup>+</sup>                | → | 85.5%                                           | → | 48.0%                                                              | → | 95.9%                                                                                                           | → | 14.5%                  |
| Parkinsonian symptoms,<br><i>n</i> = 150, 70.7% LBP <sub>any</sub> <sup>+</sup>       | → | 95.3%                                           | → | 67.8%                                                              | → | 99.0%                                                                                                           | → | 4.7%                   |
| Clinical Alzheimer's disease,<br><i>n</i> = 97, 44.3% LBP <sub>any</sub> <sup>+</sup> | → | 88.7%                                           | → | 39.5%                                                              | → | 97.1%                                                                                                           | → | 11.3%                  |
| Clinically unimpaired<br><i>n</i> = 44, 22.7% LBP <sub>any</sub> <sup>+</sup>         | → | 61.4%                                           | → | 25.9%                                                              | → | 85.7%                                                                                                           | → | 38.6%                  |

**b**

| Patient population                                                                      |   | Smell test-based high risk<br>(95% sensitivity) |   | Lewy body positivity based on<br>CSF SAA in <u>high risk group</u> |   | Lewy body positivity based on<br><i>postmortem</i> neuropathology in<br><u>high risk CSF SAA positive group</u> |   | Reduction in CSF tests |
|-----------------------------------------------------------------------------------------|---|-------------------------------------------------|---|--------------------------------------------------------------------|---|-----------------------------------------------------------------------------------------------------------------|---|------------------------|
| Whole cohort,<br><i>n</i> = 358, 29.9% LBP <sub>B/L-N</sub> <sup>+</sup>                | → | 52.2%                                           | → | 48.0%                                                              | → | 66.8%                                                                                                           | → | 47.8%                  |
| Parkinsonian symptoms,<br><i>n</i> = 150, 56.7% LBP <sub>B/L-N</sub> <sup>+</sup>       | → | 73.3%                                           | → | 67.8%                                                              | → | 83.6%                                                                                                           | → | 26.7%                  |
| Clinical Alzheimer's disease,<br><i>n</i> = 97, 22.7% LBP <sub>B/L-N</sub> <sup>+</sup> | → | 58.8%                                           | → | 39.5%                                                              | → | 52.6%                                                                                                           | → | 41.2%                  |
| Clinically unimpaired<br><i>n</i> = 44, 6.8% LBP <sub>B/L-N</sub> <sup>+</sup>          | → | 15.9%                                           | → | 25.9%                                                              | → | 42.9%                                                                                                           | → | 84.1%                  |

Summary of the proportion of individuals selected as high-risk, Lewy body (LB)-positive based on CSF, LB-positive based on *postmortem* neuropathology in **(a)** any region (LBP<sub>any</sub><sup>+</sup>) and **(b)** brainstem and limbic or neocortical LBP stages (LBP<sub>B/L-N</sub>) and the reduction in CSF tests, for each of the four clinical subgroups. B/L-N = brainstem/limbic or neocortical; CSF = cerebrospinal fluid; LBP = Lewy body pathology; SAA = seed amplification assay.
